# Supplementary material
Source: MDPI journal article supplement (https://www.mdpi.com/2504-477X/5/7/180)
Supplement: s1 [file s1]

# Influence of transition metals (Cu and Co) on the carbon-coated nickel sulfide used as positive electrode material in hybrid supercapacitor device

Souvik Ghosh, Aparna Paul, Prakas Samanta, Bhau Landge, Sanjib Kumar Mandal, Sangam Sinha, Gour Gopal Dutta, Naresh Chandra Murmu and Tapas Kuila

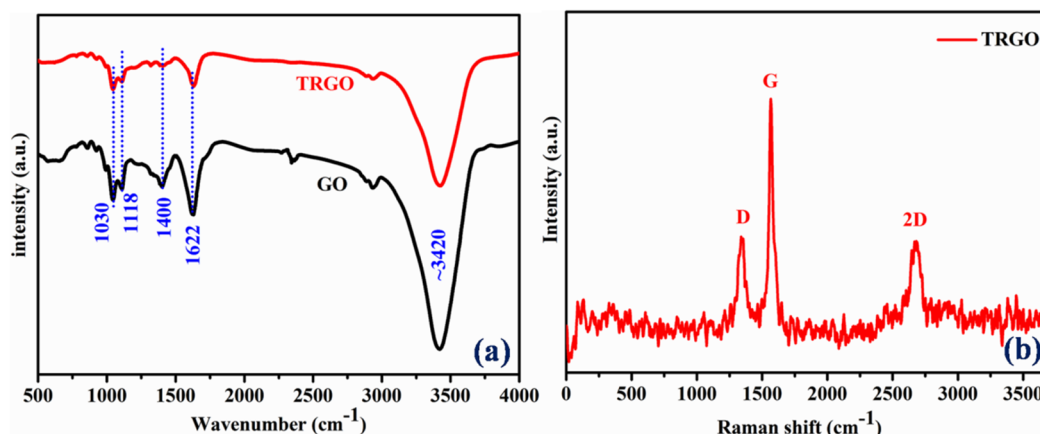

Figure S1. (a) FTIR spectra of GO and TRGO (b) Raman spectra of TRGO.

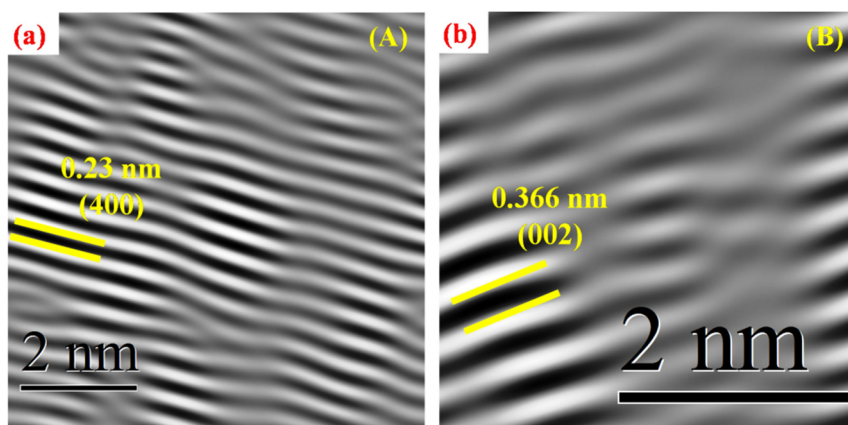

Figure S2. (a,b) IFFT pattern of [A] and [B] regions, respectively of figure 2a.

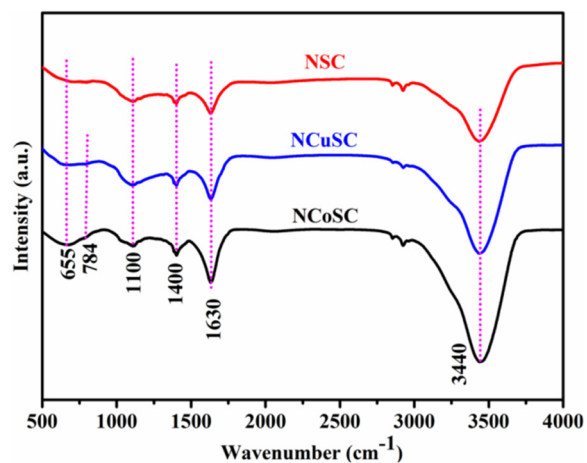

**Figure S3.** FTIR spectra of NSC, NCuSC and NCoSC electrodes.

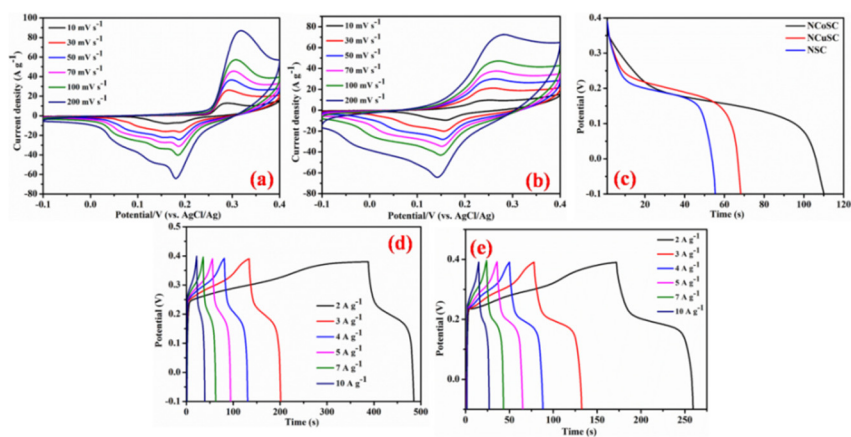

**Figure S4.** (a,b) CV curves of NSC and NCuSC electrodes at different scan rates, respectively (c) Comparable discharge plots of NSC, NCuSC and NCoSC electrodes at 3 A g<sup>-1</sup> current density (d,e) GCD plots of NSC and NCuSC electrodes, respectively at different current density.

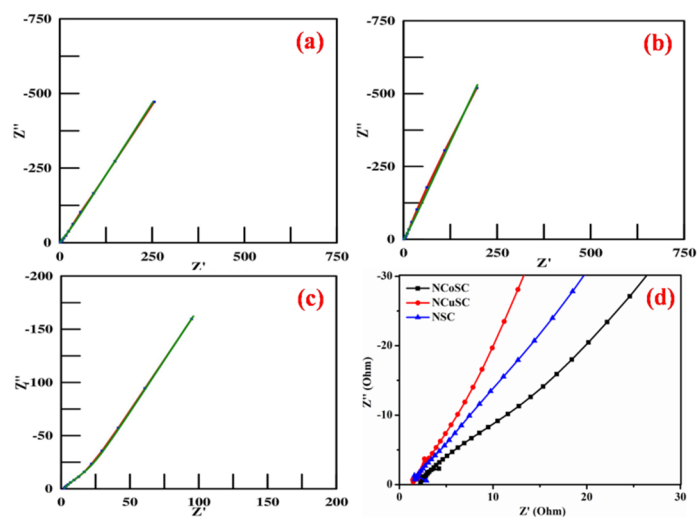

**Figure S5.** (a-c) Z-View fitted EIS spectra of NSC, NCuSC and NCoSC electrodes and (d) EIS spectra of NSC, NCuSC and NCoSC at high frequency range.

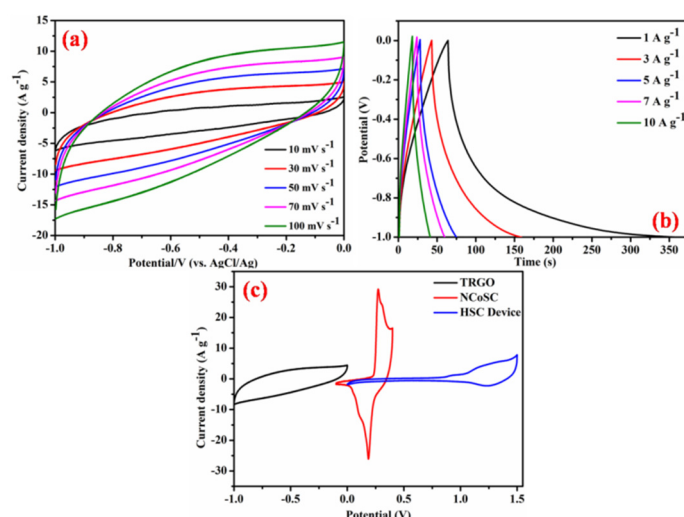

**Figure S6.** (a,b) CV and GCD plots of TRGO at different scan rate and current density, respectively (c) CV curves of positive, negative and fabricated device in their respective potential window at constant 30 mV s<sup>-1</sup> scan rate.

**Table S1: Comparison of supercapacitor properties of some nickel based hybrid supercapacitor (HSC).**

| HSC device                                                                        | Potential window (V) | Energy density (W h Kg <sup>-1</sup> ) | Power density (kW Kg <sup>-1</sup> ) | Reference |
|-----------------------------------------------------------------------------------|----------------------|----------------------------------------|--------------------------------------|-----------|
| AC// Sn-doped Ni <sub>3</sub> S <sub>2</sub>                                      | 1.4                  | 29.13                                  | 0.7                                  | 1         |
| RGO//Mo-doped nickel sulfide                                                      | 1.5                  | 38                                     | 0.45                                 | 2         |
| porous carbon nanosheets// CoNi <sub>2</sub> S <sub>4</sub> @CC                   | 1.5                  | 37.2                                   | 0.75                                 | 3         |
| Carbon aerogels//NiS                                                              | 1.4                  | 21.5                                   | 0.7                                  | 4         |
| d-Ti <sub>3</sub> C <sub>2</sub> // Ni-S/1d-Ti <sub>3</sub> C <sub>2</sub>        | 1.6                  | 20                                     | 0.4                                  | 5         |
| AC//NiCo <sub>2</sub> Se <sub>4</sub>                                             | 1.6                  | 24.03                                  | 1.055                                | 6         |
| RGO// NiCo <sub>2</sub> S <sub>4</sub> @NiCo <sub>2</sub> O <sub>4</sub>          | 1.5                  | 32                                     | 0.375                                | 7         |
| RGO@CFC// Ni <sub>0.1</sub> Co <sub>0.9</sub> ) <sub>9</sub> Se <sub>8</sub> @CFC | 1.5                  | 17                                     | 3.1                                  | 8         |
| AC//((Ni <sub>0.33</sub> Co <sub>0.67</sub> )Se <sub>2</sub>                      | 1.6                  | 29.1                                   | 0.8                                  | 9         |
| TRGO//NiCo <sub>2</sub> S <sub>4</sub> @C                                         | 1.5                  | 38.8                                   | 1.3                                  | This Work |

## References:

1. Fu, S.; Ma, L.; Gan, M.; Shen, J.; Li, T.; Zhang, X.; Zhan, W.; Xie, F.; Yang, J. Sn-Doped Nickel Sulfide (Ni<sub>3</sub>S<sub>2</sub>) Derived from Bimetallic MOF with Ultra High Capacitance. *J. Alloy. Compd.***2021**, *859*, 157798, doi:10.1016/j.jallcom.2020.157798.
2. Sangabathula, O.; Sharma, C.S. One-Pot Hydrothermal Synthesis of Molybdenum Nickel Sulfide with Graphene Quantum Dots as a Novel Conductive Additive for Enhanced Supercapacitive Performance. *Mater. Adv.***2020**, *1*, 2763–2772.
3. Yang, Y.; Zhang, Y.; Zhu, C.; Xie, Y.; Lv, L.; Chen, Y.; He, Y.; Hu, Z. Synthesis of ultrafine CoNi<sub>2</sub>S<sub>4</sub> nanowire on carbon cloth as an efficient positive electrode material for high-performance hybrid supercapacitors. *J. Alloys Compd.***2020**, *823*, 153885.
4. Zuo, L.; Fan, W.; Zhang, Y.; Huang, Y.; Gao, W.; Liu, T. Bacterial cellulose based sheet like carbon aerogels for in situ growth of nickel sulphide as high performance electrode materials for asymmetric supercapacitors. *Nanoscale***2017**, *9*, 4445–4455.
5. Luo, Y.; Yang, C.; Tian, Y.; Tang, Y.; Yin, X.; Que, W. A long cycle life asymmetric supercapacitor based on advanced nickel-sulfide/titanium carbide (MXene) nanohybrid and MXene electrodes. *J. Power Sources***2020**, *450*, 227694.

6. Guo, Z.; Diao, Y.; Han, X.; Liu, Z.; Ni, Y.; Zhang, L. Mesoporous NiCo<sub>2</sub>Se<sub>4</sub> tube as an efficient electrode material with enhanced performance for asymmetric supercapacitor applications. *CrystEngComm***2021**, *23*, 2099–2112.
7. Singh, A.; Ojha, K.S.; Singh, M.; Ojha, K.A. Controlled synthesis of NiCo<sub>2</sub>S<sub>4</sub>@NiCo<sub>2</sub>O<sub>4</sub>Core@Shell nanostructured arrays decorated over the rGO sheets for high-performance asymmetric supercapacitor. *Electrochim. Acta***2020**, *349*, 136349–136360.
8. Yang, P.; Wu, Z.; Jiang, Y.; Pan, Z.; Tian, W.; Jiang, L.; Hu, L. Fractal (Ni<sub>x</sub>Co<sub>1-x</sub>)<sub>9</sub>Se<sub>8</sub> Nano dendrite Arrays with Highly Exposed (011) Surface for Wearable, All-Solid-State Supercapacitor. *Adv. Energy Mater.***2018**, *8*, 1801392.
9. Quan, L.; Liu, T.; Yi, M.; Chen, Q.; Cai, D.; Zhan, H. Construction of hierarchical nickel cobaltselenide complex hollow spheres for pseudocapacitors with enhanced performance. *Electrochim. Acta***2018**, *281*, 109–116.
